# Supplementary material
Source: HighWire-hosted journal article supplement (https://www.cmajopen.ca/highwire/filestream/88688/field_highwire_adjunct_files/6/open-2022-0077-7-at.pdf)

Supplemental Figure 4: Boxplot cost distributions of both control group and remdesivir groups in E-CATCO

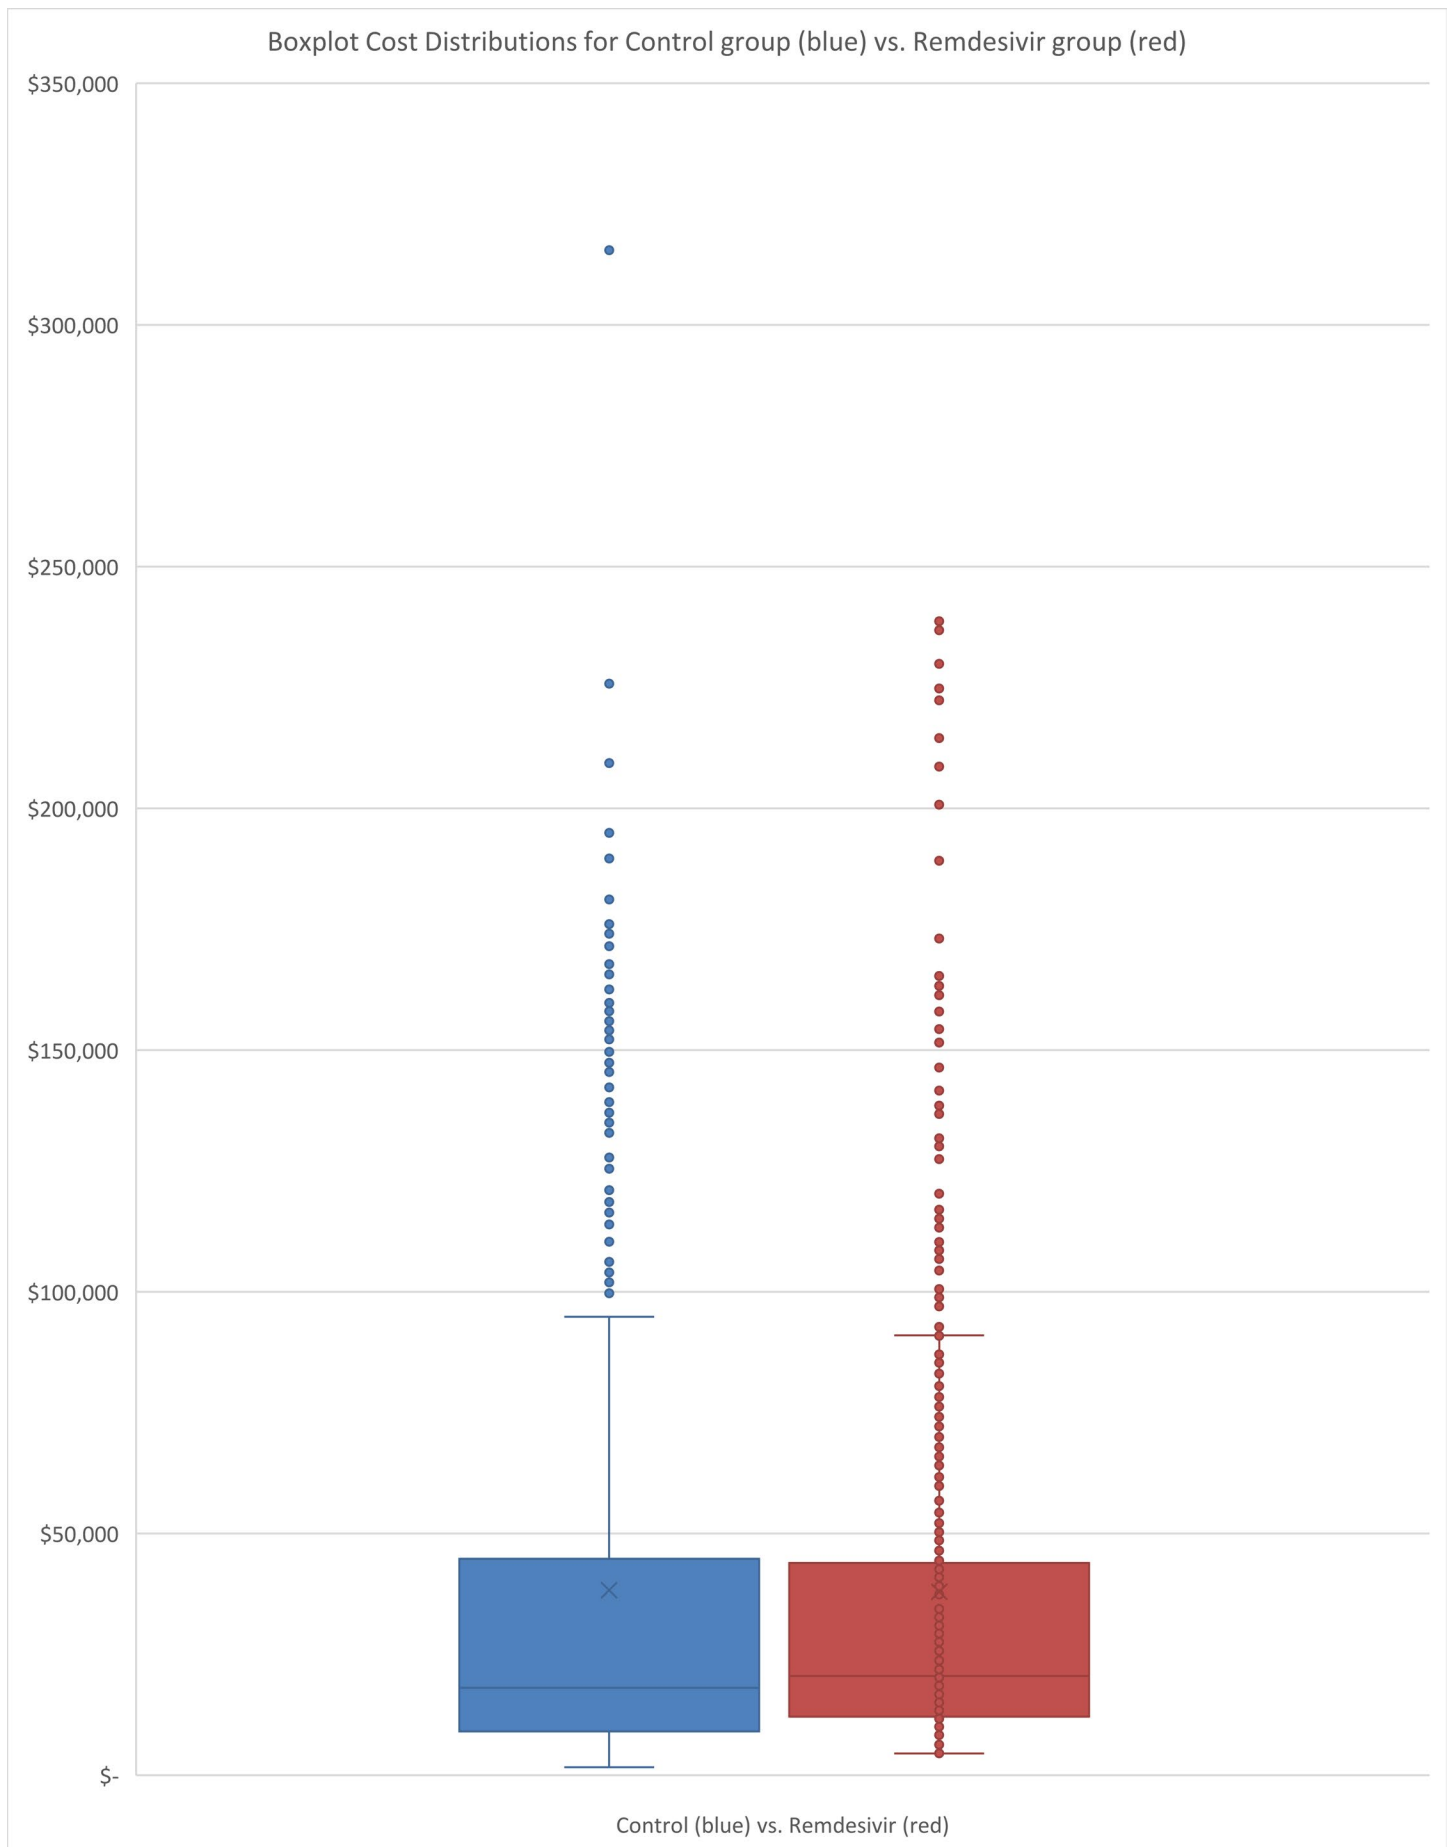

Supplement: open-2022-0077-7-at.pdf [file open-2022-0077-7-at.pdf]
